# Supplementary material
Source: HighWire-hosted journal article supplement (https://cmaj.ca/highwire/filestream/147467/field_highwire_adjunct_files/0/220452-ana-1-at.pdf)
Supplement: 220452-ana-1-at.pdf [file 220452-ana-1-at.pdf]

Summary of Literature Review of Factors Related to Racial Disparities in Prostate Cancer Incidence and Mortality

| <b>Factor(s)</b>                                                                            | <b>Reference</b>        | <b>Design, data collection</b>                                                                                                                               | <b>Major Findings</b>                                                                                                                                                                                    |
|---------------------------------------------------------------------------------------------|-------------------------|--------------------------------------------------------------------------------------------------------------------------------------------------------------|----------------------------------------------------------------------------------------------------------------------------------------------------------------------------------------------------------|
| Increased genetic predisposition to PCa and biochemical evidence of more aggressive disease | Moul et al, 1995 (1)    | Case series and cohort analysis study of newly diagnosed PCa* patients (1990-1994) and PCa patients treated by RP* with tumour volume assessment (1993-1994) | BM* with newly diagnosed PCa had higher PSA values at initial diagnosis, likely due to larger tumour volumes within TNM (clinical) stage categories                                                      |
|                                                                                             | Powell et al, 2010 (2)  | Review of autopsy data from 1,056 men who died of causes other than PCa, as well as RP and SEER* databases                                                   | BM were four times more likely to be diagnosed with advanced or metastatic PCa                                                                                                                           |
|                                                                                             | Conti et al, 2017 (3)   | Genome-wide association meta-analysis of 10,202 case subjects and 10,810 control subjects                                                                    | Identified novel signals on chromosomes 13q34 and 22q12 with risk-associated alleles for PCa found only in men of African ancestry                                                                       |
|                                                                                             | Mahal et al, 2017 (4)   | Retrospective cohort study of 390,259 men diagnosed with PCa between 2004 and 2011                                                                           | PCa outcomes are significantly worse in BM in PSA-eligible populations and BM present with 30% increase in disparity of presentation with of metastatic disease and 20% increase of PCa hazard/mortality |
|                                                                                             | Miller et al, 2018 (5)  | Analysis of participants from the PLCO* Screening Trial including cancer characteristics, diagnoses, biopsy follow-up and tumour characteristics             | BM were significantly more likely to undergo biopsy than white men and tumours in BM were more likely to be aggressive and to metastasize                                                                |
|                                                                                             | Deka et al, 2020 (6)    | Retrospective cohort study of 8,726 men with low-risk PCa followed for median of 7.6 years                                                                   | BM demonstrated a statistically significant increase in the incidence of disease progression                                                                                                             |
|                                                                                             | Rayford et al, 2021 (7) | Multi-institutional retrospective analysis including genomic profiling of 1,152 patients who underwent radical prostatectomy                                 | BM presented with more inflammatory and immune-active tumours, lower DNA repair, and higher genomic risk of metastasis                                                                                   |

|                                                                                          |                               |                                                                                                                                              |                                                                                                                                                                        |
|------------------------------------------------------------------------------------------|-------------------------------|----------------------------------------------------------------------------------------------------------------------------------------------|------------------------------------------------------------------------------------------------------------------------------------------------------------------------|
| Social determinants of health and socioeconomic barriers disproportionately affecting BM | Carpenter et al, 2010 (8)     | Retrospective database study of 18,067 men diagnosed with PCa (1994-2002) from SEER-Medicare database                                        | BM diagnosed with PCa are more likely to have longer PSA screening interval prior to diagnosis and greater likelihood of no pre-diagnosis use of PSA screening         |
|                                                                                          | Ziehr et al, 2015 (9)         | Retrospective database study of 102,486 men with localized high-risk PCa from 2004-2010 in SEER database plus census-tract-level income data | BM were less likely to receive definitive therapy for PCa, and BM in the lowest income quintile suffered the greatest PCa mortality                                    |
|                                                                                          | Dess et al, 2019 (10)         | Multiple-cohort study of 306,100 patients with PCa                                                                                           | With access to similar care and standardized treatment, BM with non-metastatic PCa had comparable PCa-specific mortality to white men                                  |
|                                                                                          | Coughlin, 2020 (11)           | Review of literature about social determinants of health and PCa survival                                                                    | Poverty, lack of education, immigration status, lack of social support, and social isolation PCa outcomes such as incidence, stage at diagnosis, survival              |
|                                                                                          | Stern et al, 2021 (12)        | Retrospective database study using data from census of 51,530 men who received PCa diagnosis between 1992-2010                               | No increased risk of PCa-specific mortality among Black men when adjusting for non-biological differences                                                              |
| Lack of representation of Black men in clinical trials                                   | Rencsok et al, 2020 (13)      | Review of 72 global phase III and IV PCa clinical trials (1987 to 2016), representing 893,378 individual participants                        | Of trials reporting race data, participants were overwhelmingly white men (96% of study population); Africa & the Caribbean comprised of only 3% of countries included |
|                                                                                          | Saltzman et al, 2022 (14)     | Database analysis of 312 trials registered in ClinicalTrials.gov                                                                             | Decreased participation rates among BM and Hispanic men in PCa and ED* clinical trials                                                                                 |
|                                                                                          | Owens-Walton et al, 2022 (15) | Database analysis of 341 phase II and III interventional trials in prostate, kidney, and bladder cancers in SEER database from 2000 to 2017  | Of trials reporting race data, Black and Asian patients were poorly represented across trials of all three cancer types                                                |

|                                                                                         |                             |                                                                                                                                                                                                 |                                                                                                                                                                                                                                                                |
|-----------------------------------------------------------------------------------------|-----------------------------|-------------------------------------------------------------------------------------------------------------------------------------------------------------------------------------------------|----------------------------------------------------------------------------------------------------------------------------------------------------------------------------------------------------------------------------------------------------------------|
| Community-related barriers, i.e., lack of adequate health information, medical mistrust | Woods et al, 2004 (16)      | Mixed-methods longitudinal cohort study of 277 BM and 94 providers exploring beliefs and behaviours about PCa screening among BM                                                                | 5 themes were identified as critical: lack of knowledge, communication, social support, quality of care, and sexuality; BM demonstrated medical mistrust and disconnectedness from healthcare system which contributed to decreased participation in screening |
|                                                                                         | Shungu et al, 2021 (17)     | Qualitative study of 21 men in 5 focus groups in 2019, assessing factors affecting informed decision-making about PCa screening among BM                                                        | BM demonstrated confusion about details of PCa screening and how to make informed decisions; participants were motivated by racial disparities data and wished for better education on the topic                                                               |
| Experimental/simulation studies estimating differences in harm-risk benefit             | Nyame et al, 2021 (18)      | Two microsimulation models of PCa data tied to SEER database projected the impact of various screening strategies (different screening intervals, starting & stopping ages, biopsy utilization) | Restricting screening of BM to 45-69 years would achieve substantial mortality reduction (26% to 29%) with low overdiagnosis (51-61 per 1000)                                                                                                                  |
|                                                                                         | Basourakos et al, 2022 (19) | Model estimates of overdiagnosis and overtreatment of PCa using SEER registry and US Census data (1986-2016) to estimate NND and NNT across racial groups                                       | Quantifying overdiagnosis with estimates shows a harm-benefit trade-off of PSA screening (NNT and NND) that is more favourable to BM than other races, indicating potential increased value in screening BM                                                    |

BM = Black/African-American men;  
PCa = prostate cancer;  
RP = radical prostatectomy;  
SEER = Surveillance, Epidemiology, and End Results Program;  
PSA = prostate-specific antigen;  
PLCO = Prostate, Lung, Colon, Ovarian Cancer Trial;  
ED = erectile dysfunction;  
NND = number needed to diagnose;  
NNT = number needed to treat

## Appendix 1 - References

1. Moul JW, Sesterhenn IA, Connelly RR, et al. Prostate-specific antigen values at the time of prostate cancer diagnosis in African-American men. *JAMA* 1995;274:1277-81.
2. Powell IJ, Bock CH, Ruterbusch JJ, et al. Evidence supports a faster growth rate and/or earlier transformation to clinically significant prostate cancer in Black than in White American men, and influences racial progression and mortality disparity. *J Urol* 2010;183:1792-6.
3. Conti DV, Wang K, Sheng X, et al. PRACTICAL/ELLIPSE Consortium. Two novel susceptibility loci for prostate cancer in men of African ancestry. *J Natl Cancer Inst* 2017;109:djx084.
4. Mahal BA, Chen Y-W, Muralidhar V, et al. Racial disparities in prostate cancer outcome among prostate-specific antigen screening eligible populations in the United States. *Ann Oncol* 2017;28:1098-104.
5. Miller EA, Pinsky PF, Black A, Andriole GL, Pierre-Victor D. Secondary prostate cancer screening outcomes by race in the Prostate, Lung, Colorectal, and Ovarian (PLCO) Screening Trial. *Prostate* 2018;78: 830-8.
6. Deka R, Courtney PT, Parsons JK, et al. Association between African American race and clinical outcomes in men treated for low-risk prostate cancer with active surveillance. *JAMA* 2020;324:1747-54.
7. Rayford W, Beksac AT, Alger J, et al. Comparative analysis of 1152 African-American and European-American men with prostate cancer identifies distinct genomic and immunological differences. *Commun Biol* 2021;4:670.
8. Carpenter WR, Howard DL, Taylor YJ, et al. Racial differences in PSA screening interval and stage at diagnosis. *Cancer Causes Control* 2010;21:1071-80.
9. Ziehr DR, Mahal BA, Aizer AA, Hyatt AS, Beard CJ, D Amico AV, et al. Income inequality and treatment of African American men with high-risk prostate cancer. *Urol Oncol*. 2015;33:18.e7–18.e13.
10. Dess RT, Hartman HE, Mahal BA, et al. Association of black race with prostate cancer-specific and other-cause mortality. *JAMA Oncol* 2019;5: 975-83.
11. Coughlin SS. A review of social determinants of prostate cancer risk, stage, and survival. *Prostate Int* 2020;8:49–54.
12. Stern N, Ly TL, Welk B, et al. Association of race and ethnicity with prostate cancer-specific mortality in Canada. *JAMA Netw Open* 2021;4:e2136364.

13. Rencsok EM, Bazzi LA, McKay RR, et al. Diversity of enrollment in prostate cancer clinical trials: current status and future directions. *Cancer Epidemiol Biomarkers Prev* 2020;29:1374-80.
14. Saltzman RG, Zucker I, Campbell K, et al. An evaluation of race-based representation among men participating in clinical trials for prostate cancer and erectile dysfunction. *Contemp Clin Trials Commun* 2022; 29:100986.
15. Owens-Walton J, Williams C, Rompré-Brodeur A, et al. Minority enrollment in Phase II and III clinical trials in urologic oncology. *J Clin Oncol* 2022;40:1583-9.
16. Woods VD, Montgomery SB, Belliard JC, et al. Culture, black men, and prostate cancer: what is reality? *Cancer Control* 2004;11: 388-96.
17. Shungu N, Sterba KR. Barriers and facilitators to informed decision-making about prostate cancer screening among black men. *J Am Board Fam Med* 2021;34: 925-36.
18. Nyame YA, Gulati R, Heijnsdijk EAM, et al. The impact of intensifying prostate cancer screening in black men: a model-based analysis. *J Natl Cancer Inst* 2021;113: 1336-42.
19. Basourakos SP, Gulati R, Vince RA Jr, et al. Harm-to-benefit of three decades of prostate cancer screening in Black men. *NEJM Evid* 2022;1, doi:10.1056/evidoa2200031.
